# Supplementary material for: Hollow heterostructured Cu1.96S/NiS microspheres coupled with nitrogen/sulfur dual-doped carbon realizing superior reaction kinetics and sodium storage
Source: Royal Society of Chemistry journal article supplement (doi:10.1039/d3nj02267f), 2023-01-01
Supplement: d3nj02267f1.pdf [file d3nj02267f1.pdf]

## Supplementary Information

### **Hollow Heterostructured Cu<sub>1.96</sub>S/NiS Microspheres Coupled with Nitrogen/Sulfur Dual-Doped Carbon Realizing Superior Reaction Kinetics and Sodium Storage**

Bo Yan,<sup>a, b</sup> Yan Li,<sup>a</sup> Lulu Zhang,<sup>b</sup> Xuelin Yang<sup>\*a</sup>

<sup>a</sup>*College of Materials and Chemical Engineering, China Three Gorges University, Yichang 443002, P. R. China.*

<sup>b</sup>*Collaborative Innovation Center for Microgrid of New Energy, College of Electrical Engineering & New Energy, China Three Gorges University, Yichang 443002, P. R. China.*

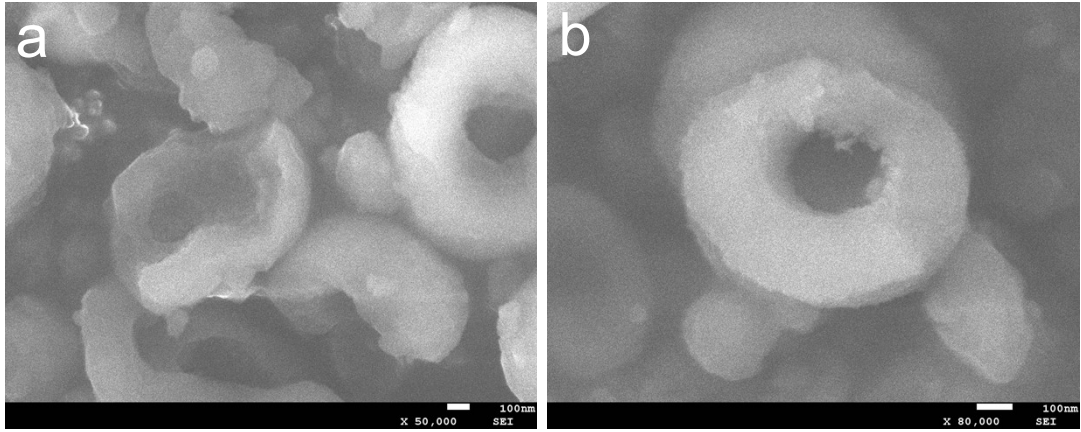

Fig. S1 (a) Low- and (b) high-magnification SEM images of damaged CuNi-G microspheres.

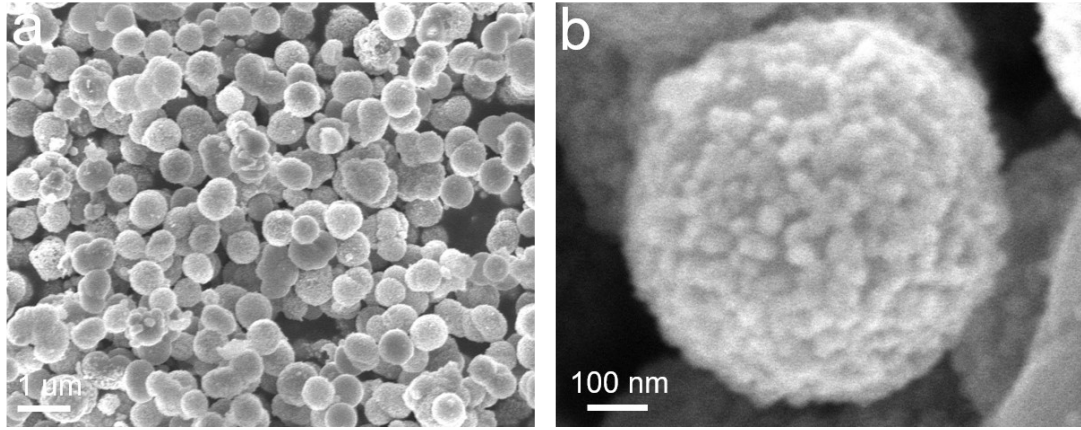

Fig. S2 (a) Low- and (b) high-magnification SEM images of Cu<sub>1.96</sub>S/NiS microspheres.

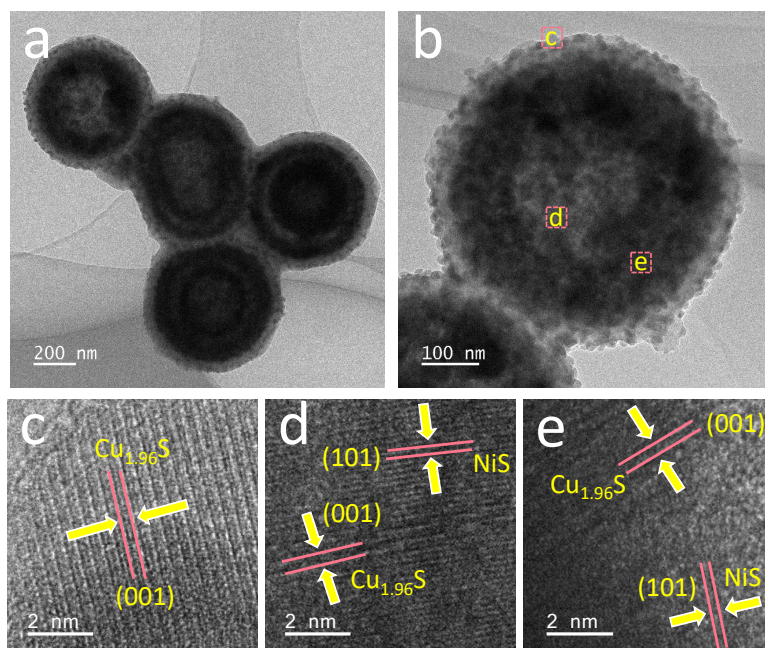

Fig. S3 (a, b) TEM of  $\text{Cu}_{1.96}\text{S}/\text{NiS}@\text{DC}$  microspheres; (c-e) HRTEM images captured from the wall edge of  $\text{Cu}_{1.96}\text{S}/\text{NiS}@\text{DC}$  shown in (b).

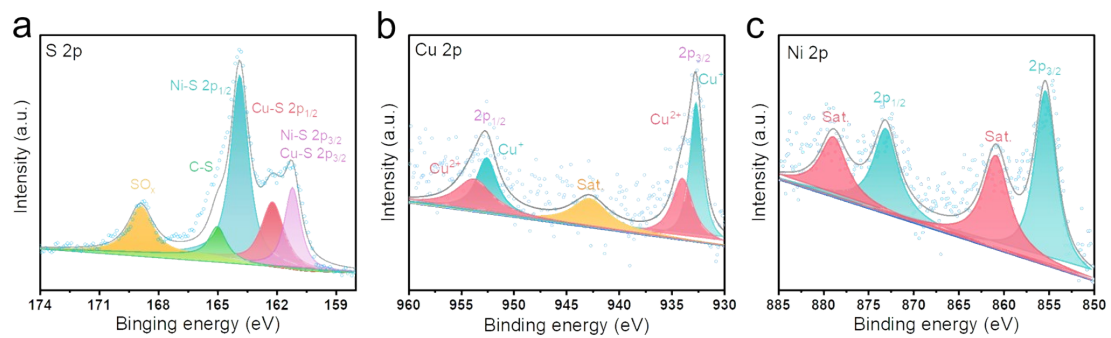

Fig. S4 The high-resolution XPS spectra of (a) S 2p, (b) Cu 2p, and (c) Ni 2p of  $\text{Cu}_{1.96}\text{S}/\text{NiS}$  microspheres.

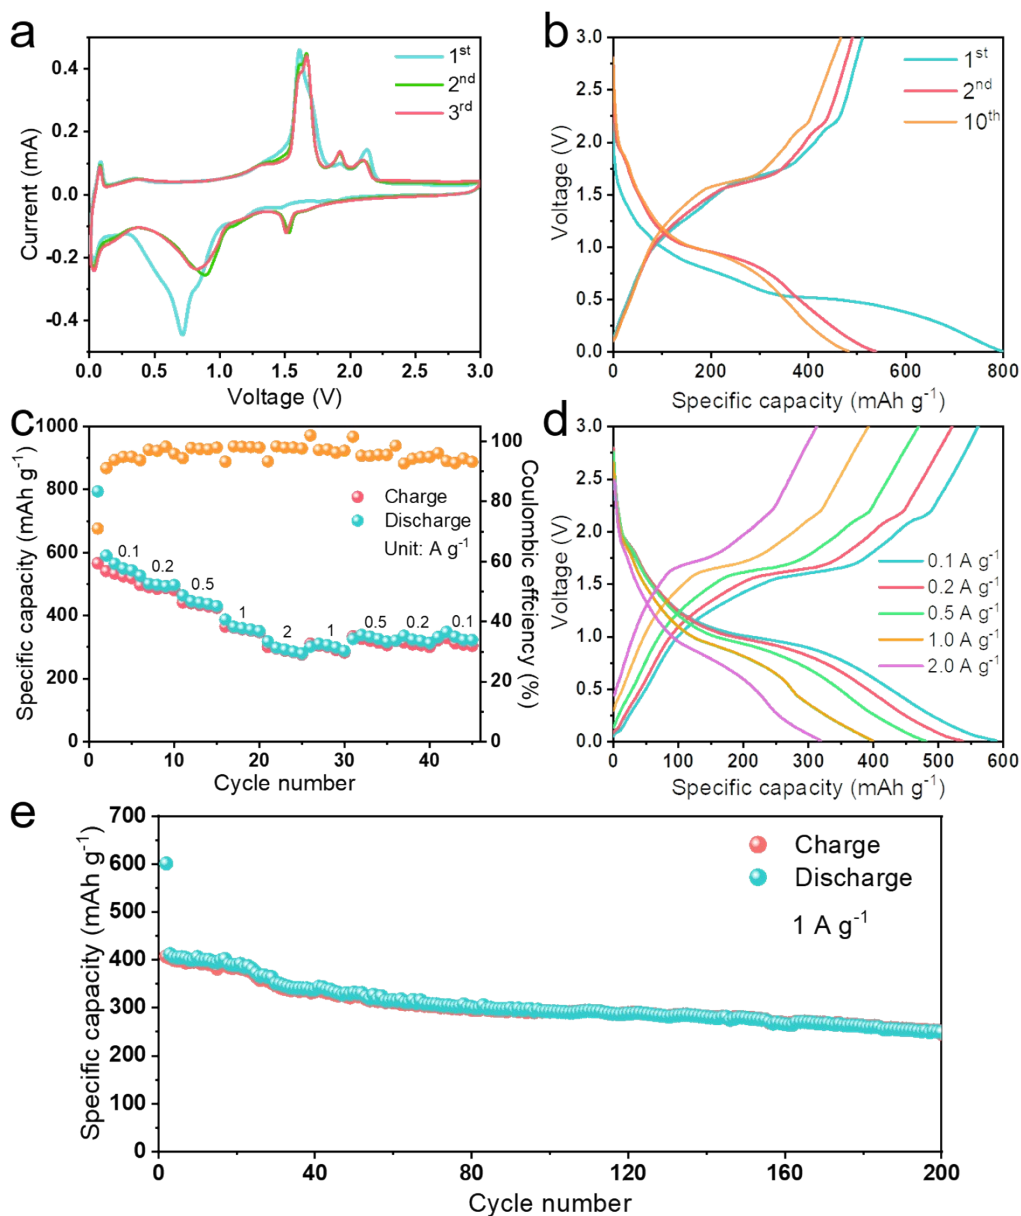

Fig. S5 Electrochemical performance of  $\text{Cu}_{1.96}\text{S}/\text{NiS}$  electrode. (a) CV curves at  $0.1 \text{ mV s}^{-1}$  in the voltage range of 0.01-3.0 V. (b) Galvanostatic charge-discharge voltage profiles at  $0.2 \text{ A g}^{-1}$ . (c) Rate performance and Coulombic efficiency ranging from 0.1 to  $2.0 \text{ A g}^{-1}$ . (d) Voltage profiles at various current densities. (e) Prolonged cycle life and Coulombic efficiency at  $1.0 \text{ A g}^{-1}$ .

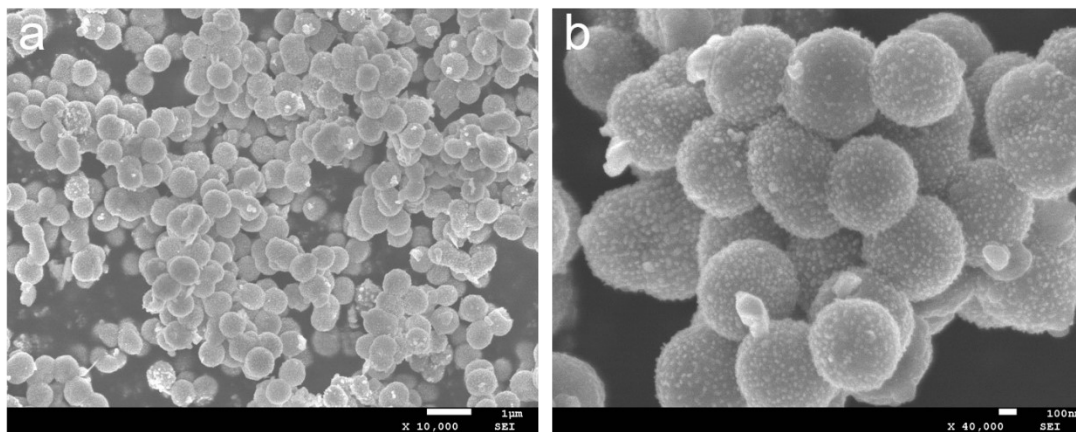

Fig. S6 (a) Low- and (b) high-magnification SEM images of L-Cu<sub>1.96</sub>S/NiS@DC microspheres.

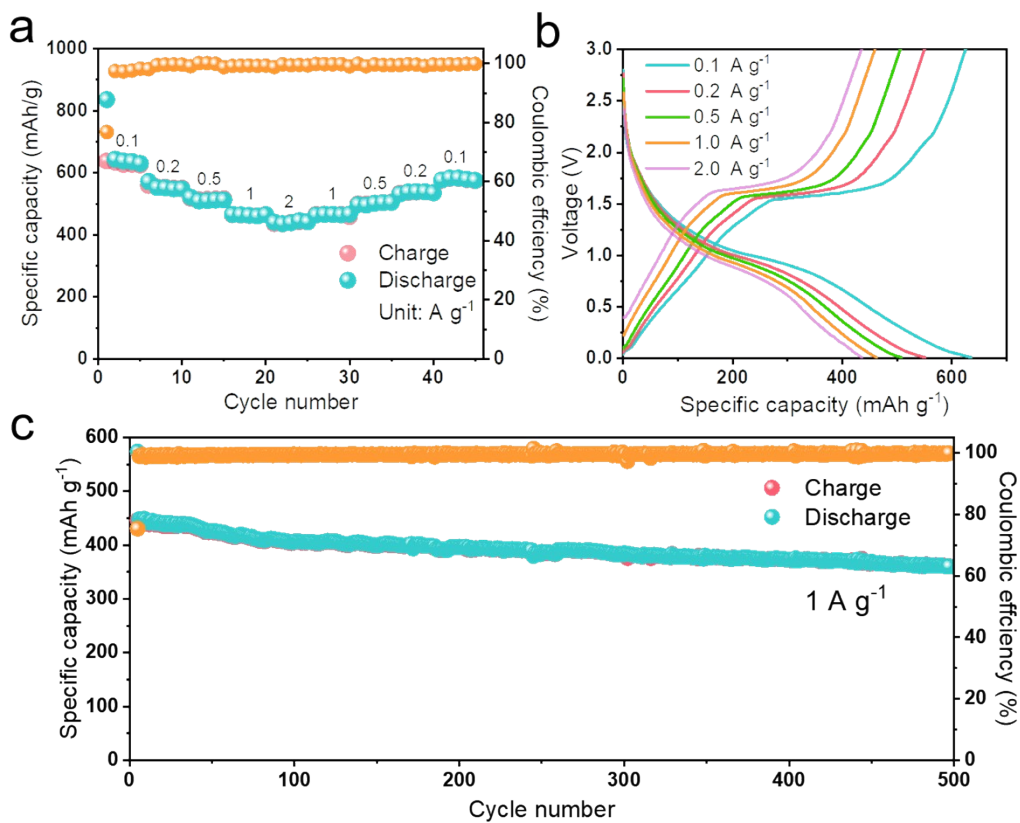

Fig. S7 Electrochemical performance of L-Cu<sub>1.96</sub>S/NiS@DC electrode. (a) Rate performance and Coulombic efficiency ranging from 0.1 to 2.0 A g<sup>-1</sup>. (b) Voltage profiles at various current densities. (c) Prolonged cycle life and Coulombic efficiency at 1.0 A g<sup>-1</sup>.



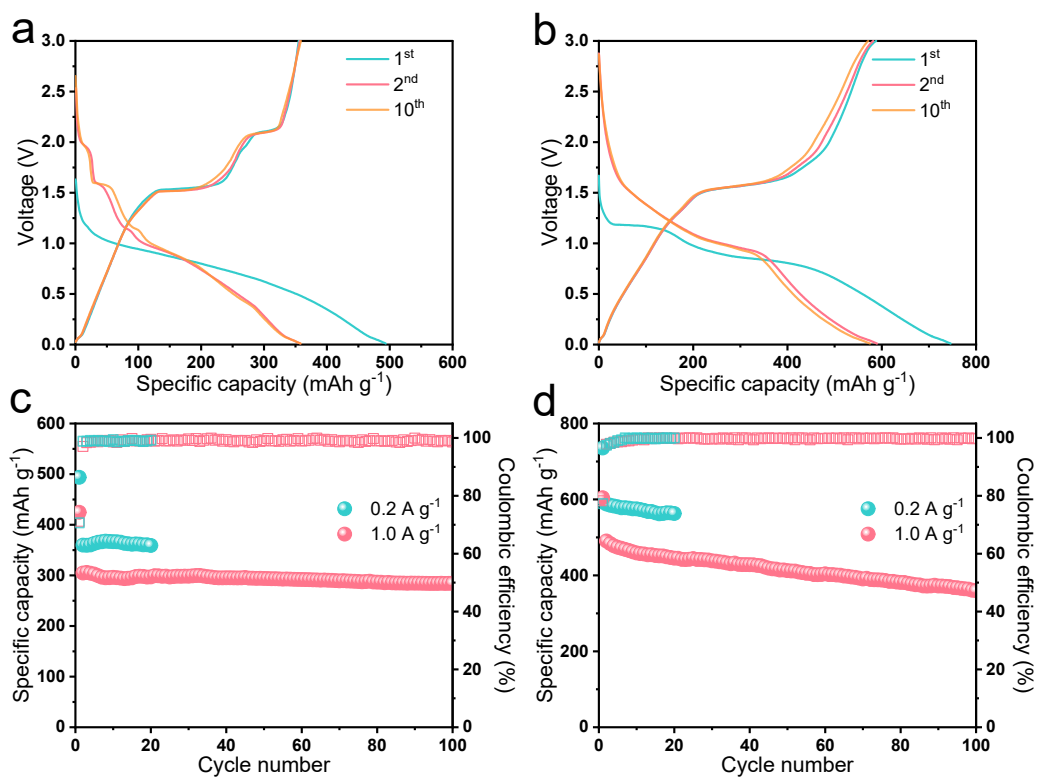

Fig. S8 Galvanostatic charge-discharge voltage profiles of the carbon-coated (a)  $\text{Cu}_{1.96}\text{S}$  and (b) NiS electrodes at  $0.2 \text{ A g}^{-1}$ . Cycle life and Coulombic efficiency of the carbon-coated (c)  $\text{Cu}_{1.96}\text{S}$  and (d) NiS electrodes at  $0.2 \text{ A g}^{-1}$  and  $1.0 \text{ A g}^{-1}$ .

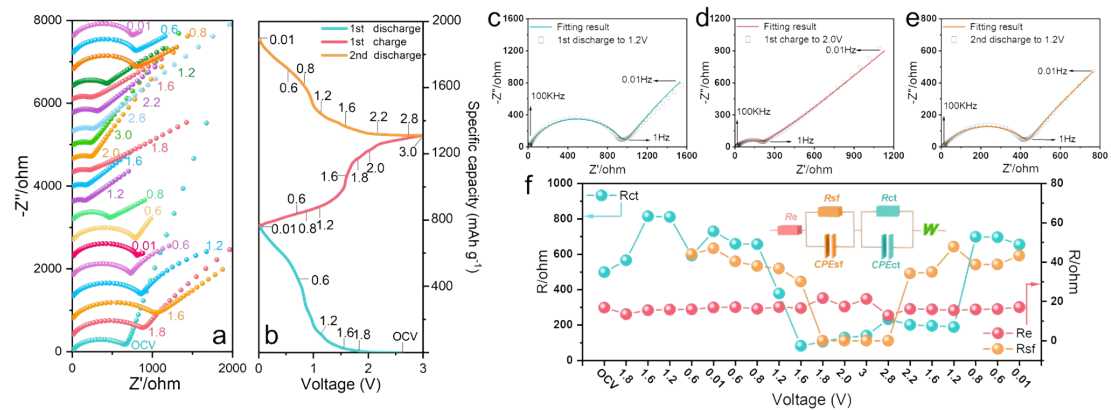

Fig. S9 Electrochemical reaction kinetics of  $\text{Cu}_{1.96}\text{S}/\text{NiS}$  electrode. (a) Nyquist plots collected at each point marked in (b) in the frequency range of 100 kHz to 10 mHz. (b) Discharge-charge profiles: each point represents an EIS measurement. Typical Nyquist plots collected at the (c) 1<sup>st</sup> discharge to 1.2 V, (d) 1<sup>st</sup> charge 2.0 V, and (e) 2<sup>nd</sup> discharge to 1.2 V. (f) EIS parameters derived from the equivalent circuit (inset of f).

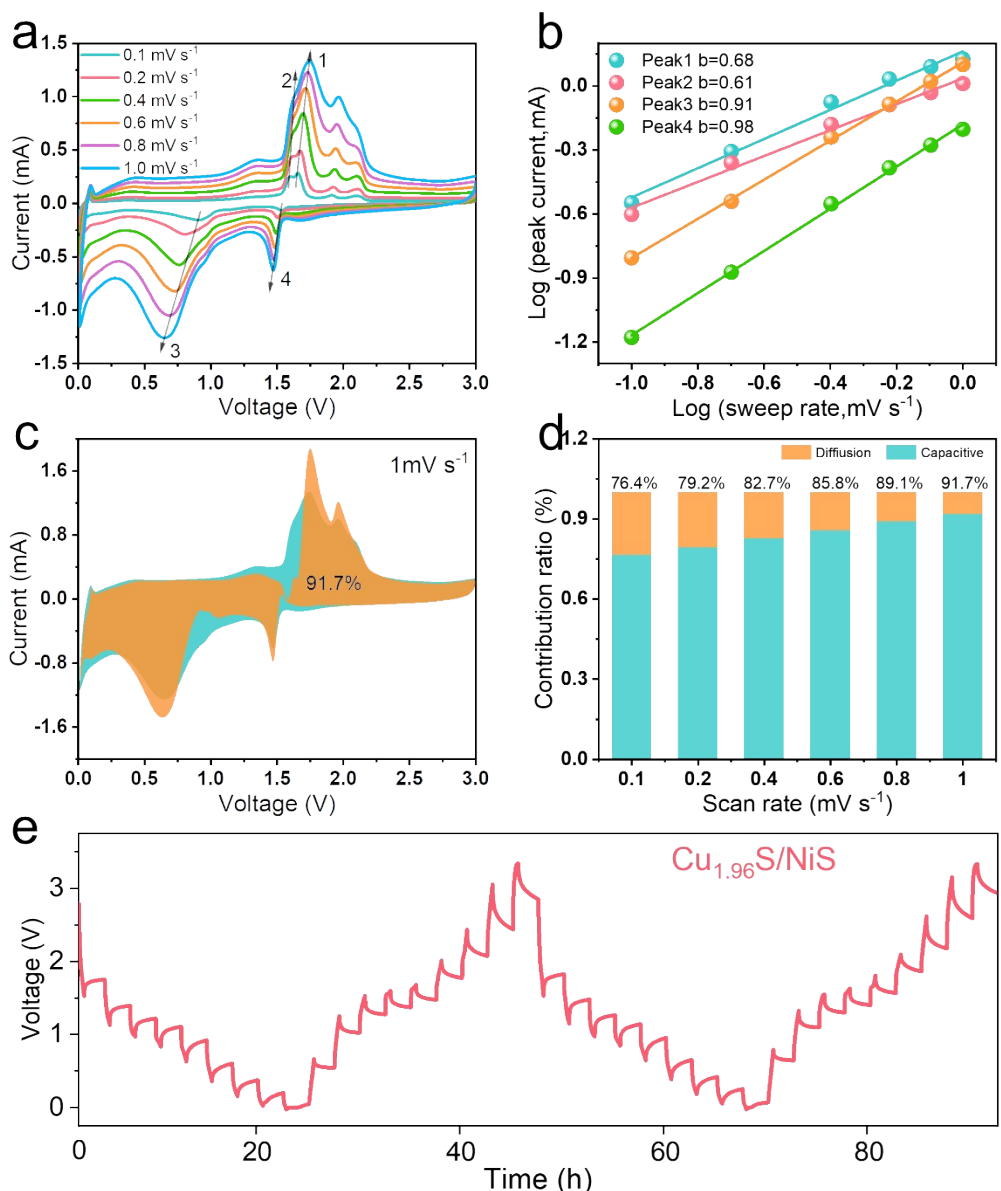

Fig. S10 Electrochemical reaction kinetics of Cu<sub>1.96</sub>S/NiS electrode. (a) CV curves at various scan rates from 0.1 to 1.0 mV s<sup>-1</sup>. (b) Determination of the b value using the relationship between peak current and scan rate. (c) Separation of the capacitive and diffusion currents at a scan rate of 1.0 mV s<sup>-1</sup> with the capacitive fraction shown by the shaded region. (d) Contribution ratio of the capacitive and diffusion-controlled charge versus scan rate. (e) GITT curves.

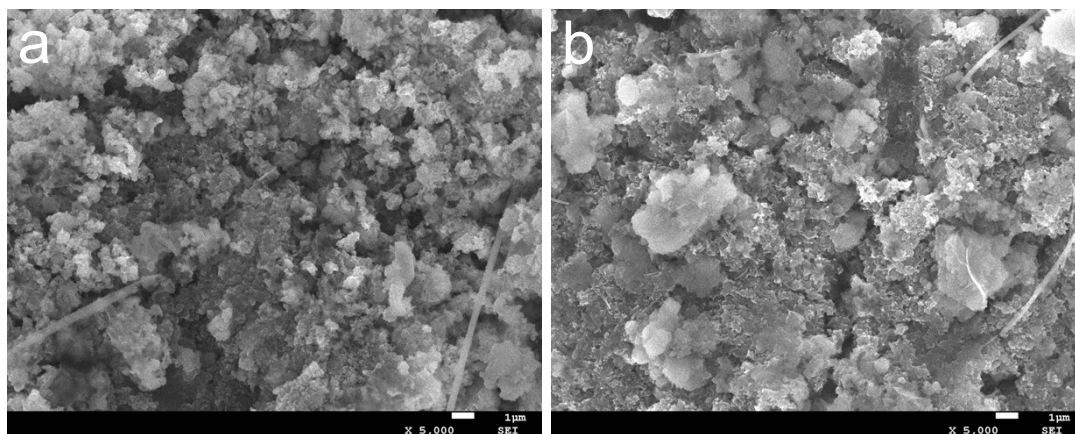

Fig. S11 SEM images of (a) Cu<sub>1.96</sub>S/NiS and (b) Cu<sub>1.96</sub>S/NiS@DC electrodes after 1000 cycles at 1.0 A g<sup>-1</sup>.

Table. S1 The atomic ratio of Cu and Ni in the obtained materials.

|         | <b>Cu<sub>1.96</sub>S/NiS@DC</b> | <b>L-Cu<sub>1.96</sub>S/NiS@DC</b> |
|---------|----------------------------------|------------------------------------|
| Cu : Ni | 0.94 : 1                         | 0.39 : 1                           |

Table S2 Electrochemical performances of Cu<sub>1.96</sub>S/NiS@DC compared with other previously-reported bimetallic sulfides based anode materials for SIBs.

| Bimetallic Sulfides                                                | Voltage window [V vs. Na <sup>+</sup> ] | Current density       | Capacity retention (%)  | Rate capacity (mAh g <sup>-1</sup> ) / current density         | Ref. |
|--------------------------------------------------------------------|-----------------------------------------|-----------------------|-------------------------|----------------------------------------------------------------|------|
| SnS <sub>2</sub> @MoS <sub>2</sub> @rGO                            | 0.01-3.0                                | 0.1 A g <sup>-1</sup> | 92.5 (after 100 cycles) | 408 at 0.2 A g <sup>-1</sup><br>346 at 0.8 A g <sup>-1</sup>   | 1    |
| Cu <sub>2</sub> S@ZnS/C                                            | 0.4-2.6                                 | 0.2 A g <sup>-1</sup> | 98.1 (after 200 cycles) | 424 at 0.2 A g <sup>-1</sup><br>415 at 1 A g <sup>-1</sup>     | 2    |
| ZnS@NC@MoS <sub>2</sub>                                            | 0.01-2.5                                | 1 A g <sup>-1</sup>   | 81.4 (after 120 cycles) | 461.4 at 0.1 A g <sup>-1</sup><br>354.6 at 1 A g <sup>-1</sup> | 3    |
| NiS/MoS <sub>2</sub> /C                                            | 0.01-3.0                                | 1 A g <sup>-1</sup>   | 70.5 (after 200 cycles) | 516 at 0.1 A g <sup>-1</sup><br>444 at 1 A g <sup>-1</sup>     | 4    |
| Ni <sub>3</sub> S <sub>2</sub> /Co <sub>9</sub> S <sub>8</sub> /NC | 0.1-3.0                                 | 0.1 A g <sup>-1</sup> | 92 (after 300 cycles)   | 405.2 at 0.1 A g <sup>-1</sup><br>347.8 at 1 A g <sup>-1</sup> | 5    |
| SnS <sub>2</sub> /FeS <sub>2</sub> /rGO                            | 0.01-3.0                                | 1 A g <sup>-1</sup>   | 85.7 (after 500 cycles) | 682.8 at 0.2 A g <sup>-1</sup><br>449.7 at 1 A g <sup>-1</sup> | 6    |
| MnS-FeS <sub>2</sub> @NSC                                          | 0.01-3.0                                | 0.1 A g <sup>-1</sup> | 80.1 (after 800 cycles) | 342.7 at 0.2 A g <sup>-1</sup><br>266.6 at 1 A g <sup>-1</sup> | 7    |
| Cu-CoS <sub>2</sub> @Cu <sub>x</sub> S                             | 0.4-2.6                                 | 0.3 A g <sup>-1</sup> | 76 (after 300cycles)    | 446 at 0.2 A g <sup>-1</sup><br>368 at 1 A g <sup>-1</sup>     | 8    |

|                                         |          |                       |                                |                                                                      |              |
|-----------------------------------------|----------|-----------------------|--------------------------------|----------------------------------------------------------------------|--------------|
| SnS <sub>2</sub> -CoS <sub>2</sub> @C   | 0.01-2.5 | 0.1 A g <sup>-1</sup> | 99<br>(after 70<br>cycles)     | 625 at<br>0.1 A g <sup>-1</sup><br>425.1 at<br>1.0 A g <sup>-1</sup> | 9            |
| FeS <sub>2</sub> /MoS <sub>2</sub> -rGO | 0.01-3.0 | 0.1 A g <sup>-1</sup> | 90.1<br>(after 150<br>cycles)  | 432.5 at<br>0.1 A g <sup>-1</sup><br>406 at<br>1 A g <sup>-1</sup>   | 10           |
| Fe <sub>1-x</sub> S/MnS                 | 0.01-2.5 | 0.1A g <sup>-1</sup>  | 81.4<br>(after 100<br>cycles)  | 561 at<br>0.05 A g <sup>-1</sup><br>350 at<br>1 A g <sup>-1</sup>    | 11           |
| CuS/FeS <sub>2</sub> @NC                | 0.01-3.0 | 0.2A g <sup>-1</sup>  | 99.1<br>(after 300<br>cycles)  | 575 at<br>1 A g <sup>-1</sup><br>608 at<br>0.2 A g <sup>-1</sup>     | 12           |
| Cu <sub>1.96</sub> S/NiS@DC             | 0.01-3.0 | 0.2 A g <sup>-1</sup> | 95.8<br>(after 140<br>cycles)  | 546.5 at<br>0.2 A g <sup>-1</sup>                                    | This<br>work |
|                                         |          | 1.0 A g <sup>-1</sup> | 89.1<br>(after 1000<br>cycles) | 466.0 at<br>1 A g <sup>-1</sup>                                      |              |

---

Table S3 Fitting parameters of Cu<sub>1.96</sub>S/NiS@DC charged to 2.0 V in the 1st cycle.

|                 |                    |                |
|-----------------|--------------------|----------------|
| Electrolyte     | $R_e$              | 8.865 $\Omega$ |
| SEI             | $R_{sf}$           | 12.98 $\Omega$ |
|                 | $CPE_{sf-T}$       | 6.769E-5       |
|                 | $CPE_{sf-P}$       | 0.7561         |
| Charge transfer | $R_{ct}$           | 42.1 $\Omega$  |
|                 | $CPE_{ct-T}$       | 7.119E-5       |
|                 | $CPE_{ct-P}$       | 0.6162         |
| Diffusion       | $R_d$ of $W_{dif}$ | 406.8 $\Omega$ |
|                 | $T$ of $W_{dif}$   | 2.156          |
|                 | $P$ of $W_{dif}$   | 1.237          |



## References

- 1 X. Yu, C. Chen, R. Li, T. Yang, W. Wang, and Y. Dai, *J. Alloys Compd.*, 2022, **896**, 162784.
- 2 B. Yu, Y. Ji, X. Hu, Y. Liu, J. Yuan, S. Lei, G. Zhong, Z. Weng, H. Zhan, and Z. Wen, *Chem. Eng. J.*, 2022, **430**, 132993.
- 3 Y. Wang, W. Kang, D. Cao, X. Fan, H. Yang, Z. Yang, and D. Sun, *Appl. Surf. Sci.*, 2022, **574**, 151715.
- 4 H. Xie, M. Chen, and L. Wu, *ACS Appl. Mater. Interfaces*, 2019, 11, 41222–41228.
- 5 X. Liu, F. Zou, K. Liu, Z. Qiang, C. J. Taubert, P. Ustriyana, B. D. Vogt, and Y. Zhu, *J. Mater. Chem. A*, 2017, **5**, 11781–11787.
- 6 Y. Chen, H. Liu, X. Guo, S. Zhu, Y. Zhao, S. Iikubo, and T. Ma, *ACS Appl. Mater. Interfaces*, 2021, **13**, 39248–39256.
- 7 Q. Liu, S. J. Zhang, C. C. Xiang, C. X. Luo, P. F. Zhang, C. G. Shi, Y. Zhou, J. T. Li, L. Huang, and S. G. Sun, *ACS Appl. Mater. Interfaces*, 2020, **12**, 43624–43633.
- 8 Y. Fang, D. Luan, Y. Chen, S. Gao, and X. W. Lou, *Angew. Chem. Int. Ed.*, **2020**, **59**, 2644–2648.
- 9 X. Liu, Y. Xiang, Q. Li, Q. Zheng, N. Jiang, Y. Huo, and D. Lin, *Electrochim. Acta*, 2021, **387**, 138525.
- 10 S. Yuvaraj, G. K. Veerasubramani, M. S. Park, P. Thangavel, and D. W. Kim, *J. Alloys Compd.*, 2020, **821**, 153222.

- 11 G. K. Veerasubramani, M. S. Park, J. Y. Choi, Y. S. Lee, S. J. Kim, and D. W. Kim, *ACS Sustain. Chem. Eng.*, 2019, **7**, 5921–5930.
- 12 J. Je, H. Lim, H. W. Jung, and S. Kim, *Small*, 2021, **18**, 2105310.
